# Supplementary material for: Process evaluation of five tailored programs to improve the implementation of evidence-based recommendations for chronic conditions in primary care
Source: PubMed Central journal article supplement (PMC5022166; doi:10.1186/s13012-016-0473-8), 2016-09-13
Supplement: 13012_2016_473_MOESM4_ESM.pdf [file 13012_2016_473_MOESM4_ESM.pdf]

# Process evaluation of five tailored programs to improve the implementation of evidence-based recommendations for chronic conditions in primary care

C. Jäger, J. Steinhäuser, T. Freund, R. Baker, S. Agarwal, M. Godycki-Cwirko, A. Kowalczyk, E. Aakhus, I. Granlund, J. van Lieshout, J. Szecsenyi and M. Wensing

## Additional file 4: Determinants identified by interviews after the delivery of the intervention

| TICD checklist                                                                         |                                                                 | Determinant original phrasing                                                                                          | T* | F* | IB* | PB* | IA* |
|----------------------------------------------------------------------------------------|-----------------------------------------------------------------|------------------------------------------------------------------------------------------------------------------------|----|----|-----|-----|-----|
| Patient factors                                                                        | Patient preferences                                             | Patients' willingness to change their medication                                                                       | GE | 4  | y   | y   | y   |
|                                                                                        |                                                                 | Patients' willingness to change their life style                                                                       | UK | 3  | y   | y   | y   |
|                                                                                        | Patient behaviour                                               | Patient do not bring their medication packages for "brown bag review"                                                  | GE | 3  | y   | y   | y   |
|                                                                                        |                                                                 | Patients do not report their medication completely                                                                     | GE | 5  | y   | y   | y   |
|                                                                                        |                                                                 | Long-term stays abroad of patients with migration background                                                           | GE | 4  | n   | n   | n   |
|                                                                                        |                                                                 | Non-adherence of patients                                                                                              | PL | 4  | n   | n   | n   |
|                                                                                        | Patient motivation                                              | Patients' interest in medication-related topics                                                                        | GE | 2  | y   | y   | y   |
|                                                                                        |                                                                 | Problems to motivate patients to physical exercise                                                                     | NW | 4  | y   | n   | n   |
|                                                                                        |                                                                 | Travel distance for patients to the GP practice                                                                        | NW | 5  | n   | n   | n   |
|                                                                                        | Beliefs and knowledge                                           | Patients' comprehension / memory of information given about medication                                                 | GE | 4  | y   | y   | y   |
|                                                                                        |                                                                 | Language barriers/low literacy level                                                                                   | GE | 4  | y   | y   | y   |
|                                                                                        |                                                                 |                                                                                                                        | NL | 5  | n   | n   | n   |
|                                                                                        |                                                                 | Awareness esp. among younger patients (for the need to have their medication lists with them)                          | GE | 4  | y   | y   | y   |
|                                                                                        |                                                                 | Too many (contradictory) information sources for patients about medication                                             | GE | 4  | y   | y   | n   |
|                                                                                        |                                                                 | Patients' disease concept /knowledge about the disease                                                                 | NW | 4  | y   | n   | n   |
|                                                                                        | PL                                                              |                                                                                                                        | 4  | y  | y   | y   |     |
|                                                                                        | UK                                                              |                                                                                                                        | 1  | y  | y   | y   |     |
|                                                                                        | Patient needs                                                   | Patients needing home visits/living in nursing homes                                                                   | GE | 4  | y   | y   | n   |
| Social support for patients                                                            |                                                                 | GE                                                                                                                     | 4  | y  | n   | n   |     |
| Capacity for organisational change                                                     | Assistance for organisational changes                           | Identification of the best target group for SMC (those patients who really profit from the recommendation)             | GE | 1  | y   | y   | y   |
|                                                                                        |                                                                 | Availability of the target group/patients to schedule appointments for SMC                                             | GE | 4  | n   | n   | n   |
|                                                                                        |                                                                 | Amount of information GPs receive                                                                                      | NW | 5  | n   | n   | n   |
|                                                                                        | Organisational culture                                          | Level of practice organisation (e.g. existence of recall system, disease management programs, scheduled appointments ) | GE | 2  | y   | y   | y   |
|                                                                                        |                                                                 | Organisation of care for CVRM patients                                                                                 | NL | 4  | y   | n   | n   |
|                                                                                        | Priority of necessary change                                    | Priority of the targeted patient group in the municipality                                                             | NW | 4  | y   | y   | y   |
| Regulations, rules, policies                                                           | Secrecy among volunteers                                        | NW                                                                                                                     | 4  | y  | n   | n   |     |
| Incentives and resources                                                               | Financial incentives and disincentives                          | Reimbursement for SMC                                                                                                  | GE | 2  | y   | y   | n   |
|                                                                                        | Availability of necessary resources                             | Time                                                                                                                   | NL | 3  | y   | n   | n   |
|                                                                                        |                                                                 |                                                                                                                        | GE | 1  | y   | y   | n   |
|                                                                                        |                                                                 |                                                                                                                        | PL | 1  | y   | n   | n   |
|                                                                                        |                                                                 |                                                                                                                        | NW | 1  | y   | y   | y   |
|                                                                                        |                                                                 |                                                                                                                        | UK | 4  | y   | n   | n   |
|                                                                                        |                                                                 | Workload / high number of targeted patients                                                                            | NL | 5  | n   | n   | n   |
|                                                                                        |                                                                 | Availability of resources to motivate and inform patients                                                              | UK | 3  | y   | y   | y   |
|                                                                                        |                                                                 | Availability of well trained staff                                                                                     | PL | 4  | y   | y   | y   |
|                                                                                        |                                                                 | Availability of voluntary organizations                                                                                | NW | 5  | y   | n   | n   |
|                                                                                        |                                                                 | Financial restraints in the healthcare budget                                                                          | NW | 4  | y   | n   | n   |
|                                                                                        | UK                                                              | 4                                                                                                                      | y  | n  | n   |     |     |
|                                                                                        | Recruitment of volunteers                                       | NW                                                                                                                     | 2  | y  | y   | y   |     |
|                                                                                        | Priority of the targeted patient group in specialist healthcare | NW                                                                                                                     | 4  | y  | y   | y   |     |
|                                                                                        | Lack of prescriptive information                                | UK                                                                                                                     | 2  | y  | y   | y   |     |
|                                                                                        | Information system                                              | Functions and compatibility of the practice software                                                                   | GE | 1  | y   | y   | n   |
|                                                                                        |                                                                 |                                                                                                                        | NL | 3  | n   | n   | n   |
| Integration of MRC scale into practice software                                        |                                                                 | PL                                                                                                                     | 1  | n  | n   | n   |     |
| Availability and practicability of software for medication checks (medication reviews) |                                                                 | GE                                                                                                                     | 4  | y  | y   | y   |     |
| Typing errors (medication lists)                                                       |                                                                 | GE                                                                                                                     | 4  | y  | n   | n   |     |
| Administration (documentation is time-consuming)                                       | NL                                                              | 5                                                                                                                      | y  | n  | n   |     |     |

|                                                                     |                                                          |                                                                                                |    |   |   |   |   |
|---------------------------------------------------------------------|----------------------------------------------------------|------------------------------------------------------------------------------------------------|----|---|---|---|---|
| Professional interactions                                           | Referral processes                                       | Prescriptions by other physicians                                                              | GE | 2 | y | y | y |
|                                                                     |                                                          | Feedback from specialists                                                                      | PL | 5 | y | n | n |
|                                                                     |                                                          | Knowledge about services/referral options in changing health care system                       | NW | 2 | y | y | y |
|                                                                     | Team skills and processes                                | Involvement of health care assistants / delegation of tasks                                    | UK | 5 | y | y | y |
|                                                                     |                                                          | Degree of teamwork                                                                             | GE | 1 | y | y | y |
|                                                                     |                                                          | Presence of practice managers                                                                  | GE | 4 | y | y | y |
|                                                                     |                                                          | Changes in staff / continuity of care                                                          | NL | 5 | n | n | n |
|                                                                     |                                                          |                                                                                                | GE | 2 | n | n | n |
|                                                                     |                                                          |                                                                                                | NW | 5 | y | n | n |
|                                                                     |                                                          | Well-being of the team members                                                                 | NL | 4 | y | n | n |
| Social, political and legal factors                                 | Contracts                                                | Contracts between pharmacies and pharmaceutical industry (patient cannot distinguish generics) | GE | 1 | y | y | y |
|                                                                     |                                                          | Participation of practices in care groups                                                      | NL | 4 | y | n | n |
|                                                                     | Payer and funder policies                                | Funds for physical exercise programs                                                           | NL | 5 | y | n | n |
| Individual health care professional factors                         | Skills needed to adhere                                  | Knowledge of guidelines (medication reviews)                                                   | GE | 5 | y | y | n |
|                                                                     |                                                          | Recognition of adverse drug reactions                                                          | GE | 5 | n | n | n |
|                                                                     |                                                          | Recognition of depression in elderly patient                                                   | NW | 4 | y | n | n |
|                                                                     |                                                          | Communication skills                                                                           | PL | 4 | y | n | n |
|                                                                     |                                                          | Skill to raise and discuss the issue of weight with patients in an acceptable way              | UK | 4 | y | y | y |
|                                                                     |                                                          | Skill to assess patients' willingness to change                                                | UK | 5 | y | y | y |
|                                                                     |                                                          | Use of a patient-friendly language (SMC)                                                       | GE | 5 | y | y | y |
|                                                                     |                                                          | Skill to effectively measure waist circumference                                               | UK | 5 | y | y | y |
|                                                                     |                                                          | Experience with the targeted patient group                                                     | NL | 5 | n | n | n |
|                                                                     | NW                                                       |                                                                                                | 2  | n | n | n |   |
|                                                                     | Attitudes and cognitions / agreement with recommendation | Attitude of GPs towards shared decision making                                                 | GE | 5 | n | n | n |
|                                                                     | Attitudes and cognitions/intention and motivation        | Travel distance for GPs to attend courses                                                      | NW | 5 | n | n | n |
|                                                                     |                                                          | Priority of referrals                                                                          | NW | 5 | n | n | n |
|                                                                     |                                                          | Interest of GPs in the targeted patient group                                                  | NW | 2 | y | n | n |
|                                                                     |                                                          | Ownership to the implementation plan                                                           | NW | 5 | y | y | y |
|                                                                     | Attitudes and cognitions / expected outcome              | Lacking conviction that recommendations are necessary because of lacking evidence              | GE | 4 | n | n | n |
|                                                                     | Attitudes towards guidelines in general                  | Attitude of GP towards standardisation of health care/guidelines                               | GE | 4 | n | n | n |
|                                                                     | Awareness and familiarity                                | Awareness for the problem on the part of the practice team                                     | GE | 3 | n | n | n |
|                                                                     | Behaviour/Nature of behaviour                            | Time for change/relapse to former routines                                                     | GE | 2 | y | y | y |
|                                                                     | Knowledge about own practice                             | Habituation/attention for changes in well-known patients                                       | NW | 5 | n | n | n |
| Professional behaviour/Capacity to plan change                      | Priority of the patient group in private health care     | NW                                                                                             | 2  | y | y | n |   |
|                                                                     | Priority of the patient group in GP practices            | NW                                                                                             | 2  | y | n | n |   |
| Determinants, which could not be assigned to any checklist category | Determinants related to the research design              | Complexity of the patient questionnaire                                                        | NL | 5 | n | n | n |
|                                                                     |                                                          | Uncertainty about the beginning and end of the intervention                                    | NL | 5 | n | n | n |
|                                                                     |                                                          | Letter is lost                                                                                 | NL | 5 | n | n | n |
|                                                                     |                                                          | Availability of GPs by phone                                                                   | NW | 5 | n | n | n |
|                                                                     | Other                                                    | Confusion of the term "depression care manager" with other services                            | NW | 5 | n | n | n |

\* T = trial, F = Frequency, IB = identified before, PB = prioritized before, IA = intended to address ° Frequency scale: 1=strong issue in almost all interviews, 2=strong issue in a few interviews, 3=side issue in almost all interviews, 4 = side issue in a few interviews, 5 = single statement
