# Supplementary material for: Process evaluation of five tailored programs to improve the implementation of evidence-based recommendations for chronic conditions in primary care
Source: Springer Nature journal article supplement (doi:10.1186/s13012-016-0473-8), 2015-12-01
Supplement: MOESM1 [file 10696738]

## Process evaluation of five tailored programs to improve the implementation of evidence-based recommendations for chronic conditions in primary care

C. Jäger, J. Steinhäuser, T. Freund, R. Baker, S. Agarwal, M. Godycki-Cwirko, A. Kowalczyk, E. Aakhus, I. Granlund, J. van Lieshout, J. Szecsenyi and M. Wensing

### Additional file 1 - Chronic conditions and recommendations targeted in the TICD-project

| Country              | Targeted chronic condition    | Recommendations chosen as implementation objectives                                                                                                                                                                                                                                                                                                                                                                                                                                                                                                                                                                                                                                                                                                                                                                                                                                       |
|----------------------|-------------------------------|-------------------------------------------------------------------------------------------------------------------------------------------------------------------------------------------------------------------------------------------------------------------------------------------------------------------------------------------------------------------------------------------------------------------------------------------------------------------------------------------------------------------------------------------------------------------------------------------------------------------------------------------------------------------------------------------------------------------------------------------------------------------------------------------------------------------------------------------------------------------------------------------|
| Germany (GE)         | Multimorbidity (polypharmacy) | <ol style="list-style-type: none"> <li>1. <b>Structured medication counseling incl. brown bag review:</b> should be offered to multimorbid patients with polypharmacy and additional risk factors at least once per year</li> <li>2. <b>Medication lists:</b> should meet minimum standards concerning layout and template and patients with permanent medication should always have them with them.</li> <li>3. <b>Medication reviews</b> should be conducted by GPs using instruments to reduce potentially inappropriate medication</li> </ol>                                                                                                                                                                                                                                                                                                                                         |
| The Netherlands (NL) | Cardiovascular Diseases (CVD) | <ol style="list-style-type: none"> <li>1. <b>SBP &lt; 140 mmHg</b> in patients at high risk for CVD</li> <li>2. <b>SBP &lt; 140 mmHg</b> in patients with established CVD</li> <li>3. <b>LDL &lt; 2,5 mmol/l</b> in patients at high risk for CVD</li> <li>4. <b>LDL &lt; 2,5 mmol/l</b> in patients with established CVD</li> <li>5. <b>Promote life-style-changes</b> in patients with (high risk for) CVD</li> <li>6. <b>Create a risk-profile</b> for patients with chronic kidney disease</li> </ol>                                                                                                                                                                                                                                                                                                                                                                                 |
| Poland (PL)          | COPD                          | <ol style="list-style-type: none"> <li>1. <b>A brief counseling to quit smoking:</b> should be offered to all patients with COPD at least once a year.</li> <li>2. <b>Assess prognosis of COPD using mMRC dyspnea scale:</b> All patients with COPD should have the degree of dyspnea assessed by the mMRC scale at least once a year and results recorded in their medical record.</li> <li>3. <b>Inform patients about COPD following a checklist:</b> Physicians should discuss the specific components of the care process with all patients with COPD.</li> <li>4. <b>Train patients in the correct use of inhaler devices</b></li> </ol>                                                                                                                                                                                                                                            |
| United Kingdom (UK)  | Obesity                       | <ol style="list-style-type: none"> <li>1. <b>Use BMI or waist circumference:</b> to determine the degree of overweight or obesity</li> <li>2. <b>Assessment:</b> of lifestyle, co-morbidities and willingness to change</li> <li>3. <b>Management of obesity:</b> A multi-component intervention should be offered to encourage increased physical activity, improved eating behaviour, and healthy eating. Drugs may be used in certain groups. The intervention should involve long-term follow up by a trained professional and be tailored to the patient's preferences, initial fitness and lifestyle.</li> <li>4. <b>Referral to specialists:</b> if the cause is uncertain, if conventional treatment has failed and surgery is being considered or if there are complex co-morbidities and specialist intervention are needed.</li> </ol>                                         |
| Norway (NW)          | Depression in the elderly     | <ol style="list-style-type: none"> <li>1. <b>Social contact:</b> should be discussed with elderly patients with depression and actions to increase social contact recommended if needed</li> <li>2. <b>Collaborative care plans:</b> should be developed by municipalities for patients with moderate and severe depression.</li> <li>3. <b>Depression Care Manager:</b> PCP should offer regular contact with a Depression Care Manager</li> <li>4. <b>Counseling:</b> PCP should offer advice regarding self-assisted programs on behavioural therapy, physical activity groups, sleeping habits, anxiety coping strategies and problem solving therapy</li> <li>5. <b>Mild depression:</b> Avoid routine prescription of antidepressants</li> <li>6. <b>Severe, recurrent or chronic depression or dysthymia:</b> Offer a combination of antidepressants and psychotherapy.</li> </ol> |

GP = general practitioner, SPB = systolic blood pressure, CVD = cardiovascular diseases, LDL = low density lipoproteine, COPD = chronic obstructive pulmonary disease, BMI = body mass index, PCP = primary care practices, mMRC = Modified British Medical Research Council
