# Supplementary material for: Process evaluation of five tailored programs to improve the implementation of evidence-based recommendations for chronic conditions in primary care
Source: Springer Nature journal article supplement (doi:10.1186/s13012-016-0473-8), 2015-12-01
Supplement: MOESM2 [file 10696738]

## Process evaluation of five tailored programs to improve the implementation of evidence-based recommendations for chronic conditions in primary care

C. Jäger, J. Steinhäuser, T. Freund, R. Baker, S. Agarwal, M. Godycki-Cwirko, A. Kowalczyk, E. Aakhus, I. Granlund, J. van Lieshout, J. Szecsenyi and M. Wensing

### Additional file 2 - strategies used in the TICD trials

| Groups of strategies                                                                                                      |                                                                                   | Original phrasing of the strategies                                                                                                       | Short term / country |
|---------------------------------------------------------------------------------------------------------------------------|-----------------------------------------------------------------------------------|-------------------------------------------------------------------------------------------------------------------------------------------|----------------------|
| Educational sessions                                                                                                      | Educational group meetings                                                        | Workshop for GPs and HCA on medication management                                                                                         | GE1                  |
|                                                                                                                           |                                                                                   | Face-to-face training for HCP on how to raise the issue of weight with patients                                                           | UK1                  |
|                                                                                                                           |                                                                                   | Face-to-face training for HCP to improve their knowledge on the management of obese and overweight patients                               | UK6                  |
|                                                                                                                           |                                                                                   | Face-to-face training for HCP on waist circumference measurement and interpretation                                                       | UK2                  |
|                                                                                                                           |                                                                                   | Training of physicians in identifying the smoking status, in anti-smoking counseling                                                      | PL1                  |
|                                                                                                                           | Educational outreach visits                                                       | Refresher training in motivational interviewing for practice nurses                                                                       | NL1                  |
|                                                                                                                           |                                                                                   | Outreach visits to general practitioners                                                                                                  | NW1                  |
| Induce knowledge exchange between peers                                                                                   | Discussion of the quality improvement concepts in the quality circle              | GE3                                                                                                                                       |                      |
| Educational materials                                                                                                     | E-learning tools for HCP and patients                                             | Online CME course on depression                                                                                                           | NW2                  |
|                                                                                                                           |                                                                                   | "Info-tool" on a tablet PC to inform patients about medication-related topics                                                             | GE4                  |
|                                                                                                                           |                                                                                   | E-learning module on CV risk management for PN                                                                                            | NL2                  |
|                                                                                                                           |                                                                                   | Twitter consultations for patients                                                                                                        | NL6                  |
|                                                                                                                           | Increase the accessibility of web resources                                       | Web resources to facilitate medication reviews provided on a tablet PC                                                                    | GE3                  |
|                                                                                                                           |                                                                                   | Creation of a website with various tools to diagnose, follow-up and counsel patients with depression                                      | NW3                  |
|                                                                                                                           |                                                                                   | Support PN to use e-health applications for patients without symptoms of depression                                                       | NL4                  |
|                                                                                                                           | Tools for patient counseling                                                      | Resources to demonstrate the benefits of a modest 5 – 10% weight loss                                                                     | UK4                  |
|                                                                                                                           |                                                                                   | Provision of demonstration inhalers                                                                                                       | PL4                  |
|                                                                                                                           | Printed information material to be handed out to individuals                      | Weight-loss-you-can-see booklets                                                                                                          | UK5                  |
|                                                                                                                           |                                                                                   | "Brown bags" with imprints encouraging patients to bring their medication packages to the practice                                        | GE6                  |
|                                                                                                                           |                                                                                   | Templates, manuals and pamphlets to be distributed to patients, their relatives and healthcare professionals in the municipality          | NW4                  |
|                                                                                                                           | Information campaign                                                              | Posters for the waiting room to raise awareness among patients                                                                            | GE5                  |
|                                                                                                                           | Brief summaries                                                                   | Provision of questions/scripts for HCP to use to assess patients motivation and readiness to lose weight                                  | UK3                  |
|                                                                                                                           |                                                                                   | Provision of summary of the NICE guidelines for diet and exercise to all HCP                                                              | /                    |
|                                                                                                                           |                                                                                   | Insertion of a printed form containing the modified Medical Research Council Dyspnea Scale (mMRC) into patients' medical records.         | PL2                  |
|                                                                                                                           |                                                                                   | Provision of a checklist for practitioners defining the elements which consultation of patients with COPD should contain                  | PL3                  |
|                                                                                                                           |                                                                                   | Provision of a summary of the evidence underlying the recommendations                                                                     | NW5                  |
|                                                                                                                           |                                                                                   | Provision of a screening instrument for depression                                                                                        | NL3                  |
|                                                                                                                           |                                                                                   | Provision of cards with treatment values                                                                                                  | NL5                  |
| Provision of a checklist for medication counseling                                                                        |                                                                                   | GE7                                                                                                                                       |                      |
| Provision of a checklist for medication reviews                                                                           |                                                                                   | GE 8                                                                                                                                      |                      |
| Provision of a template for minimum standards of medication lists                                                         | GE 9                                                                              |                                                                                                                                           |                      |
| Induce organizational change                                                                                              | Elaboration of individual implementation concepts (tailoring on individual level) | Arrange team meetings to elaborate a quality improvement concept for each practice                                                        | GE2                  |
|                                                                                                                           |                                                                                   | Support for the development collaborative care plans per community, with an option to tailor interventions to the community               | NW6                  |
|                                                                                                                           | Support for referral processes                                                    | Support for PN to refer patients with mild/severe symptoms of depression to physical activity groups or depression treatment respectively | NL7/NL8              |
| To work with health professionals from each practice to create a database of local programmes patients can be referred to |                                                                                   | UK7                                                                                                                                       |                      |

GP = general practitioner, HCA = health care assistant, HCP = health care professional, CME = continuous medical education, PN = practice nurses, NICE = National Institute of Clinical Excellence, mMRC = Modified British Medical Research Council, COPD = chronic obstructive pulmonary disease, CV= cardiovascular, GE = Germany, NL = The Netherlands, NW = Norway, UK = United Kingdom, PL = Poland
