# Supplementary material for: Process evaluation of five tailored programs to improve the implementation of evidence-based recommendations for chronic conditions in primary care
Source: Springer Nature journal article supplement (doi:10.1186/s13012-016-0473-8), 2015-12-01
Supplement: MOESM3 [file 10696738]

## Process evaluation of five tailored programs to improve the implementation of evidence-based recommendations for chronic conditions in primary care

C. Jäger, J. Steinhäuser, T. Freund, R. Baker, S. Agarwal, M. Godycki-Cwirko, A. Kowalczyk, E. Aakhus, I. Granlund, J. van Lieshout, J. Szecsenyi and M. Wensing

### Additional file 3: Framework for the interview analysis

| Main category (deductive)                                                | Sub-category (inductive) | Description | Example quotation | Frequency (1-5) * | Identified before? yes/no | Prioritised before? yes / no | TICD checklist category |
|--------------------------------------------------------------------------|--------------------------|-------------|-------------------|-------------------|---------------------------|------------------------------|-------------------------|
| Determinants for implementation                                          |                          |             |                   |                   |                           |                              |                         |
| Other suggested strategies not used in the implementation program        |                          |             |                   |                   |                           |                              | n.a.                    |
| Reasons why strategy was used as planned / considered helpful            |                          |             |                   |                   | n.a.                      | n.a.                         |                         |
| Reasons why strategies were not used as planned / not considered helpful |                          |             |                   |                   | n.a.                      | n.a.                         |                         |
| Reasons why strategies were used differently than planned / adapted      |                          |             |                   |                   | n.a.                      | n.a.                         |                         |

\* 1 = strong issue in almost all interviews, 2 = strong issue in a few interviews, 3 = side issue in almost all interviews, 4 = side issue in a few interviews, 5 = single statement
