# Supplementary material for: Process evaluation of five tailored programs to improve the implementation of evidence-based recommendations for chronic conditions in primary care
Source: Springer Nature journal article supplement (doi:10.1186/s13012-016-0473-8), 2015-12-01
Supplement: MOESM5 [file 10696738]

# Process evaluation of five tailored programs to improve the implementation of evidence-based recommendations for chronic conditions in primary care

C. Jäger, J. Steinhäuser, T. Freund, R. Baker, S. Agarwal, M. Godycki-Cwirko, A. Kowalczyk, E. Aakhus, I. Granlund, J. van Lieshout, J. Szecsenyi and M. Wensing

## Additional file 5: Results of the qualitative analysis (aspects related to the use of the strategies)

| Assignment to the TICD checklist category                                                                           |                                                       | Reasons why a strategy was used/not used or considered helpful / unhelpful (themes derived from inductive analysis)                                                                                                                                                                                                       | Example quotations                                                                                                                                                                                                                                                                                                                                                                                                                                                                                                 |
|---------------------------------------------------------------------------------------------------------------------|-------------------------------------------------------|---------------------------------------------------------------------------------------------------------------------------------------------------------------------------------------------------------------------------------------------------------------------------------------------------------------------------|--------------------------------------------------------------------------------------------------------------------------------------------------------------------------------------------------------------------------------------------------------------------------------------------------------------------------------------------------------------------------------------------------------------------------------------------------------------------------------------------------------------------|
| Individual health care professional factors                                                                         | Knowledge and skills                                  | Extent to which the strategy conveys useful / new knowledge and skills                                                                                                                                                                                                                                                    | <ul style="list-style-type: none"> <li>The workshop was helpful, (...) I could answer questions of patients more easily afterwards (GE).</li> <li>I completed the web program, but I haven't got new insights (NL).</li> <li>Yes, the e-course is excellent (...) one learns techniques and that is good (NW).</li> </ul>                                                                                                                                                                                          |
|                                                                                                                     | Awareness and familiarity                             | Extent to which the strategy raises awareness                                                                                                                                                                                                                                                                             | <ul style="list-style-type: none"> <li>I already did this before the intervention, but now I am more aware of it (NL).</li> <li>Most of us knew this from before, but the discussion increased my awareness (NW).</li> <li>It increased my awareness and perhaps I am more likely to ask patients to demonstrate the technique of inhalation (PL).</li> </ul>                                                                                                                                                      |
|                                                                                                                     | Intention and motivation                              | Extent to which the strategy motivates the target group                                                                                                                                                                                                                                                                   | <ul style="list-style-type: none"> <li>This helped us a lot. The staff was more motivated and as you can see we have realized most of the issues we have elaborated (GE).</li> <li>We didn't know what this was all about, but the information inspired me to take the CME-course (NW).</li> </ul>                                                                                                                                                                                                                 |
|                                                                                                                     |                                                       | Extent to which the target group feels responsible for using the strategy                                                                                                                                                                                                                                                 | <ul style="list-style-type: none"> <li>It certainly should be done because it is our duty (PL).</li> <li>It is not a task of the practice nurse to identify a depression (NW).</li> </ul>                                                                                                                                                                                                                                                                                                                          |
|                                                                                                                     |                                                       | Extent to which the target group sees a need or priority for the strategy                                                                                                                                                                                                                                                 | <ul style="list-style-type: none"> <li>We do all this already and this is why there was nothing to change (GE).</li> <li>I've looked at them, but I don't use them. I don't think that the content of the referral affects our partners' priorities (NW).</li> </ul>                                                                                                                                                                                                                                               |
|                                                                                                                     | Attitude towards guidelines in general                | Extent to which the strategy finds a balance between structuring care and allowing flexibility/individual care                                                                                                                                                                                                            | <ul style="list-style-type: none"> <li>I need the checklist only if I don't have knowledge. I think you should trust the doctors more! They have knowledge and they don't need checklists (GE).</li> <li>The checklist with information on what should be done is not necessary. I do not hold rigidly to what is written there (NL).</li> <li>The use of a check list probably will not improve care at all (PL).</li> <li>Yes, this template was useful. It helped me to structure my referral. (NW).</li> </ul> |
|                                                                                                                     | Professional behaviour / self-monitoring and feedback | Extent to which the strategy includes reminders / ongoing support for the requested behaviour                                                                                                                                                                                                                             | <ul style="list-style-type: none"> <li>We gave them the bag and then it worked quite well. The patients even reminded us, when we had forgotten about it (GE).</li> <li>The majority of the patients really appreciated the literature, they appreciated that it wasn't just a leaflet given to them, but that there was follow-up (UK).</li> </ul>                                                                                                                                                                |
| Extent to which the target group was reminded of the offered strategy / to which knowledge transfer was sustainable |                                                       | <ul style="list-style-type: none"> <li>I haven't paid attention to the websites, from now on I will do that (NL).</li> <li>I don't remember that I received this kind of information (NW).</li> <li>This was already some months ago. In the meantime, other information has been stored on my hard disk (GE).</li> </ul> |                                                                                                                                                                                                                                                                                                                                                                                                                                                                                                                    |
| Professional interactions                                                                                           | Communication and influence and team processes        | Extent to which the strategy implies interactive elements, exchange of experiences, team work or feedback                                                                                                                                                                                                                 | <ul style="list-style-type: none"> <li>What was most helpful for us: the experiences of the other colleagues (GE).</li> <li>That was pretty confrontational, which acted as a wake-up call (NL).</li> <li>The meeting improved our communication with other healthcare professionals in the community (NW).</li> </ul>                                                                                                                                                                                             |
| Patient factors                                                                                                     | Patient needs, preferences and knowledge              | Extent to which the strategy is valuable for and accepted by patients                                                                                                                                                                                                                                                     | <ul style="list-style-type: none"> <li>The patients often addressed us because of the posters you gave us. This was something the patients concentrated on (GE).</li> <li>This have been particularly useful for patients who live some distance from my practice (NW).</li> <li>It was their goal and not something that I set, it was what they defined and what they wanted to get to (UK).</li> </ul>                                                                                                          |

|                                                                    |                                        |                                                                                                  |                                                                                                                                                                                                                                                                                                                                                                                                                                                                                                                 |
|--------------------------------------------------------------------|----------------------------------------|--------------------------------------------------------------------------------------------------|-----------------------------------------------------------------------------------------------------------------------------------------------------------------------------------------------------------------------------------------------------------------------------------------------------------------------------------------------------------------------------------------------------------------------------------------------------------------------------------------------------------------|
| Guideline factors / recommended clinical intervention or behaviour | Accessibility                          | Extent to which the strategy is at hand (e.g. integrated into practice software)                 | <ul style="list-style-type: none"> <li>• <i>If the checklist was digital, we would probably use it (GE).</i></li> <li>• <i>The referral forms were OK, but to use them, they should have been integrated in my practice software (NW).</i></li> <li>• <i>The inhaler devices were always on my desk, so I used it (PL).</i></li> </ul>                                                                                                                                                                          |
|                                                                    |                                        | Extent to which the target group for the strategy is present / defined                           | <ul style="list-style-type: none"> <li>• <i>After the outreach visit we made a plan and decided that some patients could contact me or the practice staff regularly. The patients who received this service were very happy with it (NW).</i></li> <li>• <i>I didn't have to recommend the physical exercise group because there were no patients with mild depressive symptoms (NL).</i></li> <li>• <i>Patients who do not attend consultations due to depression are rare in my practice (NW).</i></li> </ul> |
|                                                                    | Feasibility                            | Extent to which the strategy is intuitive / functional/easy to use                               | <ul style="list-style-type: none"> <li>• <i>I did not give patients the information card because there was an error on the card (NL).</i></li> <li>• <i>We used the booklets mainly because they had photographs in it (UK).</i></li> </ul>                                                                                                                                                                                                                                                                     |
|                                                                    |                                        | Extent to which the strategy requires the use of technologies (e.g. internet connection)         | <ul style="list-style-type: none"> <li>• <i>Almost no one of our patients was able to use this tablet. The health care assistant had to read it to them (GE).</i></li> <li>• <i>The internet connection was slow, so we stopped using the online lectures, printing the PDF hand-outs instead (NW).</i></li> <li>• <i>Patients in my group are not really into twitter, even if they had internet they wouldn't use twitter (NL).</i></li> </ul>                                                                |
|                                                                    | Effort                                 | Extent to which the use of the strategy demands time or helps to save time                       | <ul style="list-style-type: none"> <li>• <i>I did not look at the web program, I was too busy (NL).</i></li> <li>• <i>Meeting with relatives is very useful and saves me a lot of time in my practice, because various family members know different things about the patient (NW).</i></li> </ul>                                                                                                                                                                                                              |
|                                                                    | Compatibility                          | Extent to which the strategy fits with pre-existing habits / structures and personal preferences | <ul style="list-style-type: none"> <li>• <i>We are not using the posters any more, because we generally don't like it, if there is so much paper on the walls in the practice (GE).</i></li> <li>• <i>We personally don't work with strive targets for patients. So I did not fill it out on the information card (NL).</i></li> <li>• <i>I don't give this kind of information, I have little experience with such services (NW).</i></li> </ul>                                                               |
|                                                                    | Quality of evidence                    | Extent to which the strategy includes information about evidence                                 | <ul style="list-style-type: none"> <li>• <i>Very useful; when patients are informed that my recommendations are consistent with national guidelines, they are more receptive (NW).</i></li> <li>• <i>Yeah, I would (use it), because it is a resource that's designed around the NICE guidelines (UK).</i></li> </ul>                                                                                                                                                                                           |
| Incentives and resources                                           | Availability of necessary resources    | Extent to which the strategy provides necessary resources / useful tools                         | <ul style="list-style-type: none"> <li>• <i>The internet tools you showed us on the tablet, to check side effects quickly, that was helpful (GE).</i></li> <li>• <i>I've read the folder together with the patient, this project has really provided valuable tools for the GP (NW).</i></li> </ul>                                                                                                                                                                                                             |
|                                                                    | Financial incentives and disincentives | Extent to which the strategy includes reimbursement / requires personal commitment               | <ul style="list-style-type: none"> <li>• <i>It is a strong motivation that the activities merit for my speciality (NW).</i></li> <li>• <i>I should do it at home and that does not motivate me at all (NL).</i></li> <li>• <i>It (the workshop) took too much time. I had to close my practice and reschedule all appointments (GE).</i></li> </ul>                                                                                                                                                             |

GE = Germany, NL = The Netherlands, NW = Norway, UK = United Kingdom, PL = Poland
