# Supplementary material for: Process evaluation of five tailored programs to improve the implementation of evidence-based recommendations for chronic conditions in primary care
Source: Springer Nature journal article supplement (doi:10.1186/s13012-016-0473-8), 2015-12-01
Supplement: MOESM6 [file 10696738]

## Process evaluation of five tailored programs to improve the implementation of evidence-based recommendations for chronic conditions in primary care

C. Jäger, J. Steinhäuser, T. Freund, R. Baker, S. Agarwal, M. Godycki-Cwirko, A. Kowalczyk, E. Aakhus, I. Granlund, J. van Lieshout, J. Szecsenyi and M. Wensing

### Additional file 6: Results of the qualitative analysis (other strategies not used in the implementation programs)

| Classification of strategies                                   |                                                 | Strategy (original phrasing)                                                                             | C                                                                                                    | IB* | PB** |
|----------------------------------------------------------------|-------------------------------------------------|----------------------------------------------------------------------------------------------------------|------------------------------------------------------------------------------------------------------|-----|------|
| Induce organizational change on practice / institutional level | Integration of processes in existing structures | Combine structured medication counseling with other "recall-appointments"                                | GE                                                                                                   | y   | y    |
|                                                                | Revision of roles / tasks of staff              | Delegation of tasks to nurses                                                                            | PL                                                                                                   | y   | y    |
|                                                                |                                                 | Assign one person to the task                                                                            | NW                                                                                                   | y   | y    |
|                                                                | Facilitate access to care                       | Hotline for selected patients                                                                            | NW                                                                                                   | n   | n    |
|                                                                |                                                 |                                                                                                          |                                                                                                      | GE  | n    |
|                                                                | Change records systems                          | Integrate resources into the practice software                                                           | NW                                                                                                   | y   | n    |
|                                                                |                                                 | Provision of software for medication checks, integrated in practice software                             | GE                                                                                                   | y   | n    |
|                                                                |                                                 | Contact software providers to change templates (medication lists)                                        | GE                                                                                                   | y   | n    |
|                                                                |                                                 | Tablet PC with connection to practice software for home visits                                           | GE                                                                                                   | n   | n    |
|                                                                | Other                                           | Provide a checklist focusing more on re-organization of care on individual level                         | PL                                                                                                   | n   | n    |
| Change on system or regional level                             | Improve health technologies                     | Insurance card with stored medication list                                                               | GE                                                                                                   | y   | n    |
|                                                                | Change tasks and responsibilities of HCP        | Specialist health care should offer group psychotherapy for elderly patients                             | NW                                                                                                   | n   | n    |
|                                                                |                                                 | Specialists in private practice could be requested a certain proportion of elderly on their patient list | NW                                                                                                   | n   | n    |
|                                                                | Support of referral processes                   | Improve communication processes at health care interfaces                                                | NW                                                                                                   | n   | n    |
|                                                                |                                                 | Facilitate contact with pulmonologists                                                                   | PL                                                                                                   | y   | n    |
|                                                                | Various                                         | Target other locations (e.g. mosques, temples, ante-natal clinics, places where elderly people meet)     | UK                                                                                                   | n   | n    |
|                                                                |                                                 | More time for patient consultations                                                                      | NW                                                                                                   | y   | y    |
|                                                                |                                                 | Standardisation of medication lists on district level                                                    | PL                                                                                                   | y   | n    |
|                                                                |                                                 | Change of laws: no trade names on medication packages                                                    | GE                                                                                                   | n   | n    |
|                                                                | Ongoing support                                 | Reminders                                                                                                | Reminders about the project (e.g. by email, telephone or practice visits) during intervention period | GE  | n    |
|                                                                |                                                 |                                                                                                          | NL                                                                                                   | n   | n    |
|                                                                |                                                 |                                                                                                          | NW                                                                                                   | n   | n    |
| Repeated training                                              |                                                 | Instruct patients repeatedly how to use inhalers                                                         | PL                                                                                                   | y   | n    |
|                                                                | Repeated training in motivational interviewing  | NL                                                                                                       | y                                                                                                    | Y   |      |
| Personal educational interventions                             | External feedback (audit and feedback)          | Send the results of this research to the practice nurses                                                 | NL                                                                                                   | n   | n    |
|                                                                | Induce knowledge exchange between peers         | Supervision of GPs by psychiatrists in collaborative care                                                | NW                                                                                                   | y   | n    |
|                                                                |                                                 | Medication reviews / feedback by pharmacists                                                             | GE                                                                                                   | y   | n    |
|                                                                |                                                 | Case conferences (in quality circles or via video)                                                       | GE                                                                                                   | y   | n    |
|                                                                |                                                 | Involve local psychiatrists into outreach visits to increase enthusiasm                                  | NW                                                                                                   | n   | n    |
|                                                                |                                                 | Practice nurses should give each other mutually feedback on motivational interviewing                    | NL                                                                                                   | n   | n    |
|                                                                | Assess existing knowledge                       | Ask patients to actively report their knowledge about their medication                                   | GE                                                                                                   | n   | n    |
|                                                                | "Training" without further specifications       | Training courses for patients on COPD                                                                    | PL                                                                                                   | y   | y    |
|                                                                |                                                 | Course in communication for people who volunteer to support elderly patients with depression             | NW                                                                                                   | y   | n    |
|                                                                |                                                 | Training courses for physicians and nurses                                                               | PL                                                                                                   | y   | y    |
|                                                                |                                                 | Training for newly employed GPs (in order to maintain knowledge in the municipality)                     | NW                                                                                                   | n   | n    |
|                                                                |                                                 | Train more staff, e.g. junior staff                                                                      | UK                                                                                                   | y   | n    |
|                                                                |                                                 | Single-day course for GPs (as alternative to online-course)                                              | NW                                                                                                   | n   | n    |

|                                                      |                                                                                     |                                                                               |    |   |   |
|------------------------------------------------------|-------------------------------------------------------------------------------------|-------------------------------------------------------------------------------|----|---|---|
| Provision of educational materials                   | Provision of materials/tools                                                        | Patient folders with relevant documents                                       | GE | y | n |
|                                                      |                                                                                     |                                                                               | NW | y | n |
|                                                      |                                                                                     | Leaflets (instead of posters)                                                 | GE | y | y |
|                                                      |                                                                                     | Posters (in addition to leaflets)                                             | PL | y | y |
|                                                      |                                                                                     | Paper-based information instead of infotool on tablet PC                      | NW | n | n |
|                                                      |                                                                                     | Provision of spirometers                                                      | GE | y | y |
|                                                      |                                                                                     | Provide information material for patients on COPD                             | PL | y | n |
|                                                      |                                                                                     | List of healthy snacks                                                        | PL | n | n |
|                                                      |                                                                                     | Integrate information on web-sites that GPs already use                       | UK | y | n |
|                                                      |                                                                                     |                                                                               | NW | y | n |
| Provision of evidence                                | Provide information on statistics of COPD                                           | PL                                                                            | N  | n |   |
|                                                      | Provide information on clinical usefulness of the interventions and recommendations | NW                                                                            | Y  | Y |   |
| Improve cost-benefit-ratio                           | Increase benefits                                                                   | Provide financial incentives                                                  | PL | y | n |
|                                                      |                                                                                     |                                                                               | NW | n | n |
|                                                      |                                                                                     | Highlight the benefits for the GPs / more intensive marketing                 | NW | y | y |
|                                                      | Reduce costs                                                                        | Simplify / shorten the intervention                                           | NL | n | n |
| Adapt strategies on individual patient level         | Lingual adaptations                                                                 | Translation (of booklets)                                                     | UK | y | n |
|                                                      | Cultural adaptations                                                                | Food-recommendations adapted to cultures                                      | UK | y | n |
|                                                      | Personal adaptations                                                                | Personalize life-style advice                                                 | NL | y | y |
| Improve development and delivery of the intervention | Involvement of the target group in the development                                  | Involve the target group into intervention development                        | NW | n | n |
|                                                      |                                                                                     |                                                                               | NL | n | n |
|                                                      |                                                                                     | Acquire commitment from municipalities and GPs                                | NW | n | n |
|                                                      | Improve information about the intervention                                          | Better guidance / guideline for the intervention / more examples              | NL | n | n |
|                                                      |                                                                                     |                                                                               | NW | y | n |
|                                                      |                                                                                     | Have one fix contact person from the research team                            | NL | n | n |
|                                                      |                                                                                     | Inform HCP about the content of the patient questionnaire for data collection | NL | n | n |
| Other                                                | Expand intervention period                                                          | NL                                                                            | n  | n |   |

\* C = country, \*\* IB = Identified before, \*\*\* PB = prioritized before; y = yes, n = no
